# Supplementary material for: Isolation and Characterization of Listeria monocytogenes Phage vB_LmoH_P61, a Phage With Biocontrol Potential on Different Food Matrices
Source: Frontiers journal article supplement (doi:10.3389/fsufs.2020.521645), 2020-11-05
Supplement: Table_1.DOCX [file Table_1.DOCX]

| Query name | Start | End | Polypeptide Length (aa) | Predicted protein Functions | Best Homolog | Blast-P identity  (100%) |
| --- | --- | --- | --- | --- | --- | --- |
| ORF00P61_0001 | 3 | 119 | 38 | Hypothetical protein | Listeria Virus A511 | 65.71% |
| ORF00P61_0002 | 326 | 565 | 79 | Transposase containing domain protein | Listeria phage LP-083-2  [YP_009044636.1](https://www.ncbi.nlm.nih.gov/protein/YP_009044636.1?report=genbank&log$=prottop&blast_rank=1&RID=JV5HARFY015) | 100% |
| ORF00P61_0003 | 571 | 867 | 98 | Transposase containing domain protein | Listeria phage A511  YP_001468547.1 | 94% |
| ORF00P61_0004 | 895 | 1464 | 189 | Hypothetical Protein | Listeria Phage A511 | 100.00% |
| ORF00P61_0005 | 1467 | 2000 | 177 | Hypothetical Protein | Listeria phage vB LmoM AG20  [YP_007676828.1](https://www.ncbi.nlm.nih.gov/protein/YP_007676828.1?report=genbank&log$=prottop&blast_rank=1&RID=JV9BWVSC015) | 98.87% |
| ORF00P61_0006 | 2015 | 27733 | 252 | Hypothetical Protein | A511  [YP_001468550.1](https://www.ncbi.nlm.nih.gov/protein/YP_001468550.1?report=genbank&log$=prottop&blast_rank=1&RID=JV9Y5P5F015) | 97.22% |
| ORF00P61_0007 | 2786 | 3076 | 96 | Hypothetical Protein | Listeria Phage LMTA-34  [AII27438.1](https://www.ncbi.nlm.nih.gov/protein/AII27438.1?report=genbank&log$=prottop&blast_rank=1&RID=JVA9Z8ZC014) | 96.88% |
| ORF00P61_0008 | 3461 | 3742 | 93 | Hypothetical Protein | Listeria Phage LP-048  [YP_009042979.1](https://www.ncbi.nlm.nih.gov/protein/YP_009042979.1?report=genbank&log$=prottop&blast_rank=1&RID=JVAW413N014) | 100% |
| ORF00P61_0009 | 4066 | 4425 | 119 | Hypothetical Protein | Listeria Phage LP-048  [YP_009042980.1](https://www.ncbi.nlm.nih.gov/protein/YP_009042980.1?report=genbank&log$=prottop&blast_rank=1&RID=JVB7NDZ5015) | 100.0% |
| ORF00P61_0010 | 4508 | 4657 | 49 | Hypothetical Protein | Listeria Virus A511  [YP_001468553.1](https://www.ncbi.nlm.nih.gov/protein/YP_001468553.1?report=genbank&log$=prottop&blast_rank=1&RID=JVBGDPKS014) | 100.00% |
| ORF00P61_0011 | 4769 | 5551 | 260 | Hypothetical Protein | Listeria Phage LmoM AG20  [YP_007676834.1](https://www.ncbi.nlm.nih.gov/protein/YP_007676834.1?report=genbank&log$=prottop&blast_rank=1&RID=JVBVH8F8015) | 96.92% |
| ORF00P61_0012 | 5747 | 6022 | 91 | Hypothetical Protein | Listeria Phage LP-083-2  [YP_009044645.1](https://www.ncbi.nlm.nih.gov/protein/YP_009044645.1?report=genbank&log$=prottop&blast_rank=1&RID=JVC6RUUJ014) | 96.70% |
| ORF00P61_0013 | 6110 | 6373 | 87 | Hypothetical Protein | Listeria Phage LMTA-34  [AII27448.1](https://www.ncbi.nlm.nih.gov/protein/AII27448.1?report=genbank&log$=prottop&blast_rank=1&RID=JVCF8TTJ015) | 98.85% |
| ORF00P61_0014 | 6457 | 6732 | 91 | Hypothetical Protein | Listeria Phage LP-125  [YP_008239977.1](https://www.ncbi.nlm.nih.gov/protein/YP_008239977.1?report=genbank&log$=prottop&blast_rank=1&RID=JVCP9ZZY015) | 100.00% |
| ORF00P61_0015 | 6808 | 7260 | 150 | Hypothetical Protein | Listeria Phage LMTA-148 | 97.33% |
| ORF00P61_0016 | 7423 | 7665 | 80 | Hypothetical Protein | Listeria Phage LMTA_148  [YP_009055599.1](https://www.ncbi.nlm.nih.gov/protein/YP_009055599.1?report=genbank&log$=prottop&blast_rank=1&RID=JVNMK2M3015) | 93.75% |
| ORF00P61_0017 | 7762 | 7905 | 47 | Hypothetical Protein | Listeria Phage LP-048  [YP_009042809.1](https://www.ncbi.nlm.nih.gov/protein/YP_009042809.1?report=genbank&log$=prottop&blast_rank=1&RID=JVNVYJBG015) | 97.87% |
| ORF00P61_0018 | 8101 | 8625 | 174 | Hypothetical Protein | Listeria Phage LP-125  [YP_008239982.1](https://www.ncbi.nlm.nih.gov/protein/YP_008239982.1?report=genbank&log$=prottop&blast_rank=1&RID=JVP72B9W015) | 97.70% |
| ORF00P61_0019 | 8806 | 91947 | 113 | Hypothetical Protein | Listeria Phage LMSP-25  [YP_009043008.1](https://www.ncbi.nlm.nih.gov/protein/YP_009043008.1?report=genbank&log$=prottop&blast_rank=1&RID=JVPGMGM3015) | 100.00% |
| ORF00P61_0020 | 9322 | 9543 | 73 | Hypothetical Protein | Listeria Phage A511  [YP_001468567.1](https://www.ncbi.nlm.nih.gov/protein/YP_001468567.1?report=genbank&log$=protalign&blast_rank=1&RID=JVPUWXN6015) | 100.00% |
| ORF00P61_0021 | 9549 | 9998 | 149 | Hypothetical Protein | Listeria phage List-36  [YP_009043548.1](https://www.ncbi.nlm.nih.gov/protein/YP_009043548.1?report=genbank&log$=prottop&blast_rank=1&RID=JVTKHAJE014) | 97.32% |
| ORF00P61_0022 | 10035 | 10313 | 92 | Hypothetical Protein | Listeria phage List-36  [YP_009043547.1](https://www.ncbi.nlm.nih.gov/protein/YP_009043547.1?report=genbank&log$=prottop&blast_rank=1&RID=JVTTNTK8014) | 98.91% |
| ORF00P61_0023 | 10938 | 11195 | 85 | Hypothetical Protein | Listeria Phage LP- 083-02 | 94.05% |
| ORF00P61_0024 | 11192 | 11449 | 85 | Hypothetical Protein | Listeria Phage LP-125  [YP_008239989.1](https://www.ncbi.nlm.nih.gov/protein/YP_008239989.1?report=genbank&log$=prottop&blast_rank=1&RID=JVUJNDKV014) | 92.94% |
| ORF00P61_0025 | 11467 | 11652 | 61 | Hypothetical Protein | Listeria Virus A511  [YP_001468574.1](https://www.ncbi.nlm.nih.gov/protein/YP_001468574.1?report=genbank&log$=prottop&blast_rank=1&RID=JVUUAGPH015) | 98.36% |
| ORF00P61_0026 | 11671 | 11844 | 57 | Hypothetical Protein | Listeria phage vB LmoM AG20  [YP_007676671.1](https://www.ncbi.nlm.nih.gov/protein/YP_007676671.1?report=genbank&log$=prottop&blast_rank=1&RID=JVVM7Z3K014) | 100.00% |
| ORF00P61_0027 | 11986 | 12261 | 91 | Hypothetical Protein | Listeria virus P100  [YP_406489.1](https://www.ncbi.nlm.nih.gov/protein/YP_406489.1?report=genbank&log$=prottop&blast_rank=1&RID=JVV9N2MU014) | 92.31% |
| ORF00P61_0028 | 12274 | 12561 | 95 | Hypothetical Protein | Listeria Virus A511  [YP_001468577.1](https://www.ncbi.nlm.nih.gov/protein/YP_001468577.1?report=genbank&log$=prottop&blast_rank=1&RID=JVVT0D5Z014) | 98.95% |
| ORF00P61_0029 | 12715 | 12987 | 90 | Hypothetical Protein | Listeria phage LP-125  [YP_008239993.1](https://www.ncbi.nlm.nih.gov/protein/YP_008239993.1?report=genbank&log$=prottop&blast_rank=1&RID=JVW7THUB014) | 100.00% |
| ORF00P61_00 30 | 13004 | 132021 | 65 | Hypothetical Protein | Listeria Phage vB LmoM AG20  [YP_007676675.1](https://www.ncbi.nlm.nih.gov/protein/YP_007676675.1?report=genbank&log$=prottop&blast_rank=1&RID=JVWERK1V015) | 100.00% |
| ORF00P61_0031 | 13304 | 13432 | 42 | Hypothetical Protein | Listeria Virus A511  [YP_001468579.1](https://www.ncbi.nlm.nih.gov/protein/YP_001468579.1?report=genbank&log$=prottop&blast_rank=1&RID=JVWYF50D014) | 100.00% |
| ORF00P61_0032 | 13735 | 14145 | 136 | YopX-like protein | Literia Phage LP-064  [YP_009592557.1](https://www.ncbi.nlm.nih.gov/protein/YP_009592557.1?report=genbank&log$=prottop&blast_rank=3&RID=JVX59R6Y015) | 97.76% |
| ORF00P61_0033 | 14142 | 14318 | 58 | Hypothetical protein | Listeria Virus A511 [YP_001468582.1](https://www.ncbi.nlm.nih.gov/protein/YP_001468582.1?report=genbank&log$=prottop&blast_rank=2&RID=JVXGCD4T015) | 98.00% |
| ORF00P61_0034 | 14320 | 14541 | 73 | Hypothetical protein | Listeria Phage LMTA-34  [AII27429.1](https://www.ncbi.nlm.nih.gov/protein/AII27429.1?report=genbank&log$=prottop&blast_rank=1&RID=JVXT710T014) | 94.52% |
| ORF00P61_0035 | 14548 | 14853 | 101 | Hypothetical protein | Listeria Phage LP-048  [YP_009042826.1](https://www.ncbi.nlm.nih.gov/protein/YP_009042826.1?report=genbank&log$=prottop&blast_rank=1&RID=JVY1DHBM014) | 88.78% |
| ORF00P61_0036 | 14846 | 15346 | 166 | Hypothetical protein | Listeria Virus A511  [YP_001468585.1](https://www.ncbi.nlm.nih.gov/protein/YP_001468585.1?report=genbank&log$=prottop&blast_rank=1&RID=JVY6MHXN014) | 98.19% |
| ORF00P61_0037 | 15349 | 15855 | 168 | Hypothetical protein | Listeria Virus A511 [YP_001468586.1](https://www.ncbi.nlm.nih.gov/protein/YP_001468586.1?report=genbank&log$=prottop&blast_rank=1&RID=JVYCEFPN015) | 99.40% |
| ORF00P61_0038 | 15865 | 17049 | 394 | Hypothetical protein | Listeria Virus A511 [YP_001468587.1](https://www.ncbi.nlm.nih.gov/protein/YP_001468587.1?report=genbank&log$=prottop&blast_rank=1&RID=JVYJ6SKV014) | 99.49% |
| ORF00P61_0039 | 17202 | 17627 | 141 | Hypothetical protein | Listeria Virus A511 [YP_001468588.1](https://www.ncbi.nlm.nih.gov/protein/YP_001468588.1?report=genbank&log$=prottop&blast_rank=1&RID=JVYV40P2014) | 100.00% |
| ORF00P61_0040 | 17645 | 17935 | 96 | Hypothetical protein | Listeria Virus A511  [YP_001468589.1](https://www.ncbi.nlm.nih.gov/protein/YP_001468589.1?report=genbank&log$=prottop&blast_rank=1&RID=JXRG7AWW014) | 100.00% |
| ORF00P61_0041 | 17932 | 18117 | 61 | Hypothetical Protein | Listeria Phage vB LmoM AG20  [YP_007676683.1](https://www.ncbi.nlm.nih.gov/protein/YP_007676683.1?report=genbank&log$=prottop&blast_rank=1&RID=JXRP1152014) | 100.00% |
| ORF00P61_0042 | 18117 | 18464 | 115 | Hypothetical Protein | Listeria Phage vB LmoM AG20  [YP_007676684.1](https://www.ncbi.nlm.nih.gov/protein/YP_007676684.1?report=genbank&log$=prottop&blast_rank=1&RID=JXRXA5ZP014) | 100.00% |
| ORF00P61_0043 | 18496 | 18777 | 93 | Hypothetical Protein | Listeria Virus A511  [YP_001468592.1](https://www.ncbi.nlm.nih.gov/protein/YP_001468592.1?report=genbank&log$=prottop&blast_rank=1&RID=JXS3EKNF014) | 100.00% |
| ORF00P61_0044 | 18856 | 19188 | 110 | Hypothetical Protein | Listeria Phage vB LmoM AG20  [YP_007676686.1](https://www.ncbi.nlm.nih.gov/protein/YP_007676686.1?report=genbank&log$=prottop&blast_rank=2&RID=JXS9X3ZC015) | 97.25% |
| ORF00P61_0045 | 19288 | 19584 | 98 | Hypothetical Protein | Listeria Virus  A511 [YP_001468594.1](https://www.ncbi.nlm.nih.gov/protein/YP_001468594.1?report=genbank&log$=prottop&blast_rank=1&RID=JXSJ8N2R015) | 94.90% |
| ORF00P61_0046 | 19603 | 19818 | 71 | Hypothetical Protein | Listeria Phage LMTA-34 [AII27396.1](https://www.ncbi.nlm.nih.gov/protein/AII27396.1?report=genbank&log$=prottop&blast_rank=1&RID=JXTREGP6015) | 95.77% |
| ORF00P61_0047 | 19851 | 20213 | 120 | Hypothetical  Protein | Listeria Virus A511 [YP_001468596.1](https://www.ncbi.nlm.nih.gov/protein/YP_001468596.1?report=genbank&log$=prottop&blast_rank=1&RID=JXTZ0MZS015) | 100% |
| ORF00P61_0048 | 20213 | 20569 | 118 | Hypothetical  Protein | Listeria Virus  [YP_001468597.1](https://www.ncbi.nlm.nih.gov/protein/YP_001468597.1?report=genbank&log$=prottop&blast_rank=1&RID=JXU722UA014) | 98.13% |
| ORF00P61_0049 | 20613 | 21386 | 257 | Serine/threonine protein phosphatase | Listeria Phage LP-048  [YP_009042839.1](https://www.ncbi.nlm.nih.gov/protein/YP_009042839.1?report=genbank&log$=prottop&blast_rank=1&RID=JXUJTBY8015) | 99.61% |
| ORF00P61_0050 | 21399 | 21717 | 106 | Hypothetical Protein | Listeria Virus A511  [YP_001468599.1](https://www.ncbi.nlm.nih.gov/protein/YP_001468599.1?report=genbank&log$=prottop&blast_rank=1&RID=JXUUT54R015) | 97.17% |
| ORF00P61_0051 | 21712 | 22022 | 102 | Hypothetical Protein | Listeria Phage List-36 [YP_009043517.1](https://www.ncbi.nlm.nih.gov/protein/YP_009043517.1?report=genbank&log$=prottop&blast_rank=1&RID=JXW3NZCP015) | 100.00% |
| ORF00P61_0052 | 22034 | 22543 | 169 | Hypothetical Protein | Listeria Phage LP-125 [YP_008240016.1](https://www.ncbi.nlm.nih.gov/protein/YP_008240016.1?report=genbank&log$=prottop&blast_rank=1&RID=JXVYK3M5014) | 100.00% |
| ORF00P61_0053 | 22565 | 22756 | 63 | Hypothetical Protein | Listeria Phage LP-125 [YP_008997825.1](https://www.ncbi.nlm.nih.gov/protein/YP_008997825.1?report=genbank&log$=prottop&blast_rank=1&RID=JXWA2BTD015) | 100.00% |
| ORF00P61_0054 | 22762 | 23046 | 94 | Hypothetical Protein | Listeria Phage LP-125 [YP_008240017.1](https://www.ncbi.nlm.nih.gov/protein/YP_008240017.1?report=genbank&log$=prottop&blast_rank=1&RID=JXWDTF61015) | 100.00% |
| ORF00P61_0055 | 23120 | 23239 | 39 | Hypothetical Protein | Listeria Phage LP-125 [YP_008240018.1](https://www.ncbi.nlm.nih.gov/protein/YP_008240018.1?report=genbank&log$=prottop&blast_rank=1&RID=JXWM10AH014) | 100.00% |
| ORF00P61_0056 | 23236 | 23517 | 93 | Hypothetical Protein | Listeria Phage vB LmoM AG20 [YP_007676695.1](https://www.ncbi.nlm.nih.gov/protein/YP_007676695.1?report=genbank&log$=prottop&blast_rank=1&RID=JXWV15BS015) | 100.00% |
| ORF00P61_0057 | 23577 | 23801 | 74 | Hypothetical Protein | Listeria Phage LP-125[YP_008997826.1](https://www.ncbi.nlm.nih.gov/protein/YP_008997826.1?report=genbank&log$=prottop&blast_rank=1&RID=JXX2GADG014) | 100.00% |
| ORF00P61_0058 | 23802 | 24344 | 180 | Hypothetical Protein  (Calcium binding and coiled-coil domain CALCOCO1 like) | Listeria Phage LP-125  [YP_008240020.1](https://www.ncbi.nlm.nih.gov/protein/YP_008240020.1?report=genbank&log$=prottop&blast_rank=1&RID=JXXAA4C6014) | 98.89% |
| ORF00P61_0059 | 24341 | 24568 | 75 | Hypothetical Protein | Listeria Phage LP-125  [YP_008240021.1](https://www.ncbi.nlm.nih.gov/protein/YP_008240021.1?report=genbank&log$=prottop&blast_rank=1&RID=JXY4AZ5S015) | 100.00% |
| ORF00P61_0060 | 24571 | 25824 | 417 | Hypothetical Protein | Listeria Phage LP-083-2 [YP_009044508.1](https://www.ncbi.nlm.nih.gov/protein/YP_009044508.1?report=genbank&log$=prottop&blast_rank=1&RID=JXY9BFPV015) | 97.12% |
| ORF00P61_0061 | 25826 | 26248 | 140 | Hypothetical Protein | Listeria Phage List-36 [YP_009043509.1](https://www.ncbi.nlm.nih.gov/protein/YP_009043509.1?report=genbank&log$=prottop&blast_rank=1&RID=JXYFY7ZN015) | 100.00% |
| ORF00P61_0062 | 26313 | 26801 | 162 | Hypothetical Protein | Listeria Virus A511 [YP_001468608.1](https://www.ncbi.nlm.nih.gov/protein/YP_001468608.1?report=genbank&log$=prottop&blast_rank=1&RID=JXYT3BT6015) | 98.77% |
| ORF00P61_0063 | 26807 | 27439 | 210 | DUF4379 domain-containing protein | Listeria phage LMTA-34  [AII27382.1](https://www.ncbi.nlm.nih.gov/protein/AII27382.1?report=genbank&log$=prottop&blast_rank=1&RID=JXYYTP9R014) | 97.22% |
| ORF00P61_0064 | 27442 | 27639 | 65 | Tail Fibres | Listeria phage LMTA-34  [AII27381.1](https://www.ncbi.nlm.nih.gov/protein/AII27381.1?report=genbank&log$=prottop&blast_rank=3&RID=JY305JEF014) | 96.92% |
| ORF00P61_0065 | 27629 | 28048 | 139 | DUF3268 (Zinc Finger) containing protein | Listeria Virus P100  [YP_406526.1](https://www.ncbi.nlm.nih.gov/protein/YP_406526.1?report=genbank&log$=prottop&blast_rank=1&RID=JXZFWNYJ014) | 100.00% |
| ORF00P61_0066 | 28045 | 28230 | 61 | Hypothetical Protein | Listeria Phage LP-125  [YP_008997827.1](https://www.ncbi.nlm.nih.gov/protein/YP_008997827.1?report=genbank&log$=prottop&blast_rank=1&RID=JY09PDAY015) | 96.72% |
| ORF00P61_0067 | 28221 | 28838 | 205 | Putative Phosphoeterase | Listeria phage vB LmoM AG20  [YP_007676704.1](https://www.ncbi.nlm.nih.gov/protein/YP_007676704.1?report=genbank&log$=prottop&blast_rank=2&RID=JY7D8BCH014) | 99.02% |
| ORF00P61_0068 | 28835 | 29053 | 72 | Hypothetical Protein | Listeria Virus P100  [YP_406528.1](https://www.ncbi.nlm.nih.gov/protein/YP_406528.1?report=genbank&log$=prottop&blast_rank=1&RID=JY7ND70Y014) | 100.00% |
| ORF00P61_0069 | 29070 | 29447 | 125 | Putative sugar phosphatase | Listeria phage vB LmoM AG20  [YP_007676706.1](https://www.ncbi.nlm.nih.gov/protein/YP_007676706.1?report=genbank&log$=prottop&blast_rank=1&RID=JY7VUWJ1015) | 100.00% |
| ORF00P61_0070 | 29450 | 29806 | 118 | Hypothetical Protein | Listeria phage vB LmoM AG20  [YP_007676707.1](https://www.ncbi.nlm.nih.gov/protein/YP_007676707.1?report=genbank&log$=prottop&blast_rank=1&RID=JY85UMRG015) | 99.15% |
| ORF00P61_0071 | 29886 | 30827 | 313 | Putative RNA ligase | Listeria Phage –LP-125 [YP_008240032.1](https://www.ncbi.nlm.nih.gov/protein/YP_008240032.1?report=genbank&log$=prottop&blast_rank=2&RID=JY8DH0G9015) | 99.36% |
| ORF00P61_0072 | 30841 | 31377 | 178 | Hypothetical Protein | Listeria Phage LP-083-2  [YP_009044520.1](https://www.ncbi.nlm.nih.gov/protein/YP_009044520.1?report=genbank&log$=prottop&blast_rank=1&RID=JYEBKSEJ015) | 99.44% |
| ORF00P61_0073 | 31374 | 31565 | 63 | Hypothetical Protein | Listeria Phage LP-048  [YP_009042859.1](https://www.ncbi.nlm.nih.gov/protein/YP_009042859.1?report=genbank&log$=prottop&blast_rank=1&RID=JYEH4Z4W014) | 100.00% |
| ORF00P61_0074 | 31566 | 32069 | 167 | DUF1768/NADAR containing protein | Listeria virus A511  [YP_001468620.1](https://www.ncbi.nlm.nih.gov/protein/YP_001468620.1?report=genbank&log$=prottop&blast_rank=1&RID=JYERNTMP014) | 99.40% |
| ORF00P61_0075 | 32071 | 32340 | 89 | Hypothetical Protein | Listeria Virus A511  [YP_001468621.1](https://www.ncbi.nlm.nih.gov/protein/YP_001468621.1?report=genbank&log$=prottop&blast_rank=1&RID=JYF2SVDB015) | 98.88% |
| ORF00P61_0076 | 32387 | 33598 | 403 | tRNA-splicing ligase | Listeria Phage LP-048 | 100.00% |
| ORF00P61_0077 | 33707 | 33910 | 67 | Hypothetical Protein | Listeria Virus A511  [YP_001468623.1](https://www.ncbi.nlm.nih.gov/protein/YP_001468623.1?report=genbank&log$=prottop&blast_rank=1&RID=JYFGYPMM014) | 100.00% |
| ORF00P61_0078 | 33903 | 34334 | 143 | Hypothetical Protein | Listeria Phage vB LmoM AG20  [YP_007676715.1](https://www.ncbi.nlm.nih.gov/protein/YP_007676715.1?report=genbank&log$=prottop&blast_rank=1&RID=JYFX7SY5015) | 99.30% |
| ORF00P61_0079 | 34348 | 34572 | 74 | Hypothetical Protein | Listeria Phage vB LmoM AG20  [YP_008997828.1](https://www.ncbi.nlm.nih.gov/protein/YP_008997828.1?report=genbank&log$=prottop&blast_rank=2&RID=JYG45H65014) | 100.00% |
| ORF00P61_0080 | 34586 | 34828 | 80 | Helix-turn-helix XRE family like protein | Listeria Virus A511  [YP_001468626.1](https://www.ncbi.nlm.nih.gov/protein/YP_001468626.1?report=genbank&log$=prottop&blast_rank=1&RID=JYG95YUA014) | 100.00% |
| ORF00P61_0081 | 34929 | 36449 | 506 | Hypothetical Protein (Putative DUF2828 domain) | Listeria phage vB LmoM AG20  [YP_007676718.1](https://www.ncbi.nlm.nih.gov/protein/YP_007676718.1?report=genbank&log$=prottop&blast_rank=1&RID=JYGGC1ZK014) | 99.60% |
| ORF00P61_0082 | 36861 | 37073 | 70 | Hypothetical Protein | Listeria Virus A511  [YP_001468628.1](https://www.ncbi.nlm.nih.gov/protein/YP_001468628.1?report=genbank&log$=prottop&blast_rank=1&RID=KB01X6U001R) | 100.00% |
| ORF00P61_0083 | 37174 | 37392 | 72 | Hypothetical Protein | Listeria Phage A511  [YP_001468629.1](https://www.ncbi.nlm.nih.gov/protein/YP_001468629.1?report=genbank&log$=prottop&blast_rank=1&RID=KB7CVBC6014) | 100.00% |
| ORF00P61_0084 | 38463 | 38870 | 135 | Hypothetical Protein | Listeria Phage LMTA-94  [AID17212.1](https://www.ncbi.nlm.nih.gov/protein/AID17212.1?report=genbank&log$=prottop&blast_rank=1&RID=KB7NR4TF014) | 100.00% |
| ORF00P61_0085 | 38896 | 39093 | 65 | Hypothetical Protein | Listeria Virus A511  [YP_001468631.1](https://www.ncbi.nlm.nih.gov/protein/YP_001468631.1?report=genbank&log$=prottop&blast_rank=1&RID=KB8AKJAU014) | 98.46% |
| ORF00P61_0086 | 41228 | 41503 | 91 | Hypothetical Protein (DUF2829 containing protein ) | Listeria Virus  [YP_001468634.1](https://www.ncbi.nlm.nih.gov/protein/YP_001468634.1?report=genbank&log$=prottop&blast_rank=1&RID=KBAY8W8G014) | 100.00% |
| ORF00P61_0087 | 41627 | 42052 | 141 | Hypothetical Protein | Listeria Phage List-36  [YP_009043485.1](https://www.ncbi.nlm.nih.gov/protein/YP_009043485.1?report=genbank&log$=prottop&blast_rank=1&RID=KBB7KH4N015) | 100.00% |
| ORF00P61_0088 | 43409 | 43645 | 78 | Hypothetical Protein | Listeria Phage LP-048  [YP_009042873.1](https://www.ncbi.nlm.nih.gov/protein/YP_009042873.1?report=genbank&log$=prottop&blast_rank=1&RID=KBBJ8XEW015) | 100.00% |
| ORF00P61_0089 | 43695 | 44036 | 113 | Hypothetical Protein  (PHA02414) | Listeria Virus A511  [YP_001468637.1](https://www.ncbi.nlm.nih.gov/protein/YP_001468637.1?report=genbank&log$=prottop&blast_rank=1&RID=KBBWETY2015) | 99.12% |
| ORF00P61_0090 | 44061 | 44405 | 114 | Hypothetical Protein | Listeria Virus A511  [YP_001468638.1](https://www.ncbi.nlm.nih.gov/protein/YP_001468638.1?report=genbank&log$=prottop&blast_rank=1&RID=KBCC307V01R) | 100.00% |
| ORF00P61_0091 | 44421 | 44690 | 89 | Hypothetical Protein | Listeria phage vB LmoM AG20  [YP_007676728.1](https://www.ncbi.nlm.nih.gov/protein/YP_007676728.1?report=genbank&log$=prottop&blast_rank=1&RID=KE0XA08N014) | 100.00% |
| ORF00P61_0092 | 44785 | 45192 | 135 | Hypothetical Protein | Listeria Phage WIL-1  [YP_009101001.1](https://www.ncbi.nlm.nih.gov/protein/YP_009101001.1?report=genbank&log$=prottop&blast_rank=1&RID=KE1A17D1014) | 98.52% |
| ORF00P61_0093 | 45176 | 45448 | 90 | Hypothetical Protein | Listeria Virus A511 [YP_001468451.1](https://www.ncbi.nlm.nih.gov/protein/YP_001468451.1?report=genbank&log$=prottop&blast_rank=1&RID=KE1MYS56014) | 100.00% |
| ORF00P61_0094 | 45454 | 45870 | 138 | Hypothetical Protein | Listeria Virus A511  [YP_001468452.1](https://www.ncbi.nlm.nih.gov/protein/YP_001468452.1?report=genbank&log$=prottop&blast_rank=1&RID=KGFZ3FXM01R) | 100.00% |
| ORF00P61_0095 | 45870 | 46151 | 93 | Putative terminase small subunit (Hypothetical Protein) | Listeria Virus A511  [YP_001468453.1](https://www.ncbi.nlm.nih.gov/protein/YP_001468453.1?report=genbank&log$=prottop&blast_rank=1&RID=KGGP4T5W01R) | 100.00% |
| ORF00P61_0096 | 46517 | 48055 | 512 | Terminase Large Subunit | Listeria Phage LMSP-25  [YP_009043081.1](https://www.ncbi.nlm.nih.gov/protein/YP_009043081.1?report=genbank&log$=prottop&blast_rank=1&RID=KGHA1AG301R) | 100% |
| ORF00P61_0097 | 48124 | 48963 | 279 | Hypothetical Protein | Listeria phage vB LmoM AG20  [YP_007676734.1](https://www.ncbi.nlm.nih.gov/protein/YP_007676734.1?report=genbank&log$=prottop&blast_rank=1&RID=KJUTRYU1014) | 99.64% |
| ORF00P61_0098 | 48968 | 49165 | 65 | Hypothetical Protein | Listeria Virus A511  [YP_001468456.1](https://www.ncbi.nlm.nih.gov/protein/YP_001468456.1?report=genbank&log$=prottop&blast_rank=1&RID=KJV4S05A015) | 96.92% |
| ORF00P61_0099 | 49155 | 49793 | 212 | Hypothetical Protein | Listeria Phage LMTA-94  [AID17199.1](https://www.ncbi.nlm.nih.gov/protein/AID17199.1?report=genbank&log$=prottop&blast_rank=1&RID=KJVANZY2015) | 100.00% |
| ORF00P61_0100 | 49783 | 50163 | 126 | Hypothetical Protein | Listeria phage vB LmoM AG20  [YP_007676737.1](https://www.ncbi.nlm.nih.gov/protein/YP_007676737.1?report=genbank&log$=prottop&blast_rank=1&RID=KJVGJ9JU014) | 100.00% |
| ORF00P61_0101 | 50227 | 51252 | 341 | N-acetylmuramoyl-L-alanine amidase | Listeria Phage LP-125  [YP_008240059.1](https://www.ncbi.nlm.nih.gov/protein/YP_008240059.1?report=genbank&log$=prottop&blast_rank=1&RID=KJVSE2YH014) | 100.00% |
| ORF00P61_0102 | 51425 | 52153 | 242 | 3D domain containing protein | Listeria Phage LP-125  [YP_008240060.1](https://www.ncbi.nlm.nih.gov/protein/YP_008240060.1?report=genbank&log$=prottop&blast_rank=1&RID=KJW2PXNV014) | 100.00% |
| ORF00P61_0103 | 52256 | 52576 | 106 | Hypothetical Protein | Listeria Virus A511  [YP_001468461.1](https://www.ncbi.nlm.nih.gov/protein/YP_001468461.1?report=genbank&log$=prottop&blast_rank=1&RID=KJWJUK34015) | 99.06% |
| ORF00P61_0104 | 52578 | 52928 | 116 | Hypothetical Protein | Listeria Virus A511 [YP_001468462.1](https://www.ncbi.nlm.nih.gov/protein/YP_001468462.1?report=genbank&log$=prottop&blast_rank=1&RID=KJWS9PRB015) | 98.28% |
| ORF00P61_0105 | 52945 | 54588 | 547 | Portal Protein | Listeria phage List-36  [YP_009043469.1](https://www.ncbi.nlm.nih.gov/protein/YP_009043469.1?report=genbank&log$=prottop&blast_rank=4&RID=KJWYDGWX014) | 99.63% |
| ORF00P61_0106 | 54687 | 55481 | 264 | Porhead protease | Listeria Virus A511  [YP_001468464.1](https://www.ncbi.nlm.nih.gov/protein/YP_001468464.1?report=genbank&log$=prottop&blast_rank=1&RID=KJX7W87C015) | 99.62% |
| ORF00P61_0107 | 55474 | 56376 | 300 | Hypothetical Protein | Listeria Phage LMTA-148  [YP_009055678.1](https://www.ncbi.nlm.nih.gov/protein/YP_009055678.1?report=genbank&log$=prottop&blast_rank=1&RID=KJXFGCAD015) | 99.00% |
| ORF00P61_0108 | 56547 | 57950 | 467 | Major Capsid Protein | Listeria Virus A511  [YP_001468466.1](https://www.ncbi.nlm.nih.gov/protein/YP_001468466.1?report=genbank&log$=prottop&blast_rank=1&RID=KJXVFYZ1015) | 100.00% |
| ORF00P61_0109 | 58032 | 58382 | 116 | Hypothetical Protein | Listeria phage vB LmoM AG20  [YP_007676746.1](https://www.ncbi.nlm.nih.gov/protein/YP_007676746.1?report=genbank&log$=prottop&blast_rank=1&RID=KJY2RU04015) | 99.14% |
| ORF00P61_0110 | 58389 | 58270 | 293 | Hypothetical Protein | Listeria Phage vB LmoM AG20  [YP_007676747.1](https://www.ncbi.nlm.nih.gov/protein/YP_007676747.1?report=genbank&log$=prottop&blast_rank=1&RID=KK0STF74014) | 99.32% |
| ORF00P61_0111 | 59288 | 60106 | 272 | Hypothetical Protein | Listeria Phage LMSP-25  [YP_009043097.1](https://www.ncbi.nlm.nih.gov/protein/YP_009043097.1?report=genbank&log$=prottop&blast_rank=1&RID=KK0HVGYE015) | 99.63% |
| ORF00P61_0112 | 60106 | 60723 | 205 | Hypothetical Protein | Listeria Virus A511  [YP_001468470.1](https://www.ncbi.nlm.nih.gov/protein/YP_001468470.1?report=genbank&log$=prottop&blast_rank=1&RID=KK0W11E5015) | 99.02% |
| ORF00P61_0113 | 60736 | 60723 | 279 | Hypothetical Protein | Listeria Virus A511  [YP_001468471.1](https://www.ncbi.nlm.nih.gov/protein/YP_001468471.1?report=genbank&log$=prottop&blast_rank=1&RID=KK10BF74014) | 99.64% |
| ORF00P61_0114 | 61575 | 61895 | 106 | Hypothetical Protein | Listeria Virus A511 [YP_001468472.1](https://www.ncbi.nlm.nih.gov/protein/YP_001468472.1?report=genbank&log$=prottop&blast_rank=1&RID=KK14GHVX015) | 99.06% |
| ORF00P61_0115 | 61899 | 63587 | 562 | Tail Sheath Protein | Listeria Phage LMTA-34  [AII27332.1](https://www.ncbi.nlm.nih.gov/protein/AII27332.1?report=genbank&log$=prottop&blast_rank=1&RID=KNF3SW9P014) | 99.82% |
| ORF00P61_0116 | 63655 | 64077 | 140 | Tail tube protein | Listeria Virus A511  [YP_001468474.1](https://www.ncbi.nlm.nih.gov/protein/YP_001468474.1?report=genbank&log$=prottop&blast_rank=1&RID=KNF6DH87015) | 100.00% |
| ORF00P61_0117 | 64229 | 64672 | 147 | Tail tape measure protein | Listeria Virus A511  [YP_001468475.1](https://www.ncbi.nlm.nih.gov/protein/YP_001468475.1?report=genbank&log$=prottop&blast_rank=1&RID=KNFB32WT015) | 100.00% |
| ORF00P61_0118 | 64728 | 65333 | 201 | RNA polymerase | Listeria Virus A511 [YP_001468476.1](https://www.ncbi.nlm.nih.gov/protein/YP_001468476.1?report=genbank&log$=prottop&blast_rank=1&RID=KNFU1PZA014) | 100.00% |
| ORF00P61_0119 | 65395 | 69123 | 1242 | Putative tail Lysin | Listeria Phage vB LmoM AG20  [YP_007676756.1](https://www.ncbi.nlm.nih.gov/protein/YP_007676756.1?report=genbank&log$=prottop&blast_rank=1&RID=KNGH1GK0014) | 99.52% |
| ORF00P61_0120 | 69169 | 71556 | 795 | Putative Tail Lysin | Listeria Virus A511  [YP_001468478.1](https://www.ncbi.nlm.nih.gov/protein/YP_001468478.1?report=genbank&log$=prottop&blast_rank=1&RID=KNGBHNRA014) | 99.62% |
| ORF00P61_0121 | 71574 | 73106 | 510 | Hypothetical protein (Reovirus Sigma C capsid protein) | Listeria Virus A511  [YP_001468479.1](https://www.ncbi.nlm.nih.gov/protein/YP_001468479.1?report=genbank&log$=prottop&blast_rank=1&RID=KXDW2Y20014) | 100.00% |
| ORF00P61_0122 | 73144 | 73857 | 237 | Hypothetical protein | Listeria Virus A511  [YP_001468480.1](https://www.ncbi.nlm.nih.gov/protein/YP_001468480.1?report=genbank&log$=prottop&blast_rank=1&RID=KXED9MJB014) | 100.00% |
| ORF00P61_0123 | 73862 | 74395 | 177 | Hypothetical protein | Listeria Phage LP-064  [YP_009592648.1](https://www.ncbi.nlm.nih.gov/protein/YP_009592648.1?report=genbank&log$=prottop&blast_rank=1&RID=KXENS359015) | 100.00% |
| ORF00P61_0124 | 74382 | 75092 | 236 | Putative Baseplate protein | Listeria Phage vB LmoM AG20 [YP_007676761.1](https://www.ncbi.nlm.nih.gov/protein/YP_007676761.1?report=genbank&log$=prottop&blast_rank=1&RID=KXEX1D4U014) | 99.58% |
| ORF00P61_0125 | 75106 | 76152 | 348 | Baseplate J-like protein | Listeria Virus A511  [YP_001468483.1](https://www.ncbi.nlm.nih.gov/protein/YP_001468483.1?report=genbank&log$=prottop&blast_rank=1&RID=M0H3VY4C014) | 100% |
| ORF00P61_0126 | 76188 | 80129 | 1313 | Hypothetical Protein (F5_F8_type_C) | Listeria Virus A511  [YP_001468484.1](https://www.ncbi.nlm.nih.gov/protein/YP_001468484.1?report=genbank&log$=prottop&blast_rank=1&RID=M0HC5RRE015) | 96.04% |
| ORF00P61_0127 | 80246 | 80767 | 173 | Chain A | Listeria Virus A511  [6HHK_A](https://www.ncbi.nlm.nih.gov/protein/6HHK_A?report=genbank&log$=prottop&blast_rank=1&RID=M0HWDTXG015) | 98.84% |
| ORF00P61_0128 | 80784 | 84239 | 1511 | Hypothetical Protein (tail protein) | Listeria Virus A511  [YP_001468486.1](https://www.ncbi.nlm.nih.gov/protein/YP_001468486.1?report=genbank&log$=prottop&blast_rank=1&RID=M0J4WFEN015) | 99.83% |
| ORF00P61_0129 | 84285 | 84506 | 73 | Hypothetical Protein (RNA pol II promoter Fmp27 protein domain) | Listeria Phage vB LmoM AG20  [YP_007676766.1](https://www.ncbi.nlm.nih.gov/protein/YP_007676766.1?report=genbank&log$=prottop&blast_rank=1&RID=M2P2SZ5F015) | 97.62% |
| ORF00P61_0130 | 84509 | 85801 | 430 | Hypothetical Protein (PHAO1818) | Listeria Phage LP-125 [YP_008240088.1](https://www.ncbi.nlm.nih.gov/protein/YP_008240088.1?report=genbank&log$=prottop&blast_rank=1&RID=M2PVFPU5015) | 97.67% |
| ORF00P61_0131 | 85833 | 86243 | 136 | Hypothetical Protein (XkdW superfamily) | Listeria Phage LP-064 [YP_009592656.1](https://www.ncbi.nlm.nih.gov/protein/YP_009592656.1?report=genbank&log$=prottop&blast_rank=1&RID=M2R3UTD0015) | 94.85% |
| ORF00P61_0132 | 86240 | 86377 | 45 | XkdX domain containing protein | Listeria Phage LMSP-25 | 97.78% |
| ORF00P61_0133 | 86478 | 88223 | 581 | Putative UvsW helicase | Listeria Phage vB LmoM AG20  [YP_007676770.1](https://www.ncbi.nlm.nih.gov/protein/YP_007676770.1?report=genbank&log$=prottop&blast_rank=1&RID=M2RPS20F014) | 100.00% |
| ORF00P61_0134 | 88238 | 89878 | 546 | Winged helix-turn-helix domain containing protein | Listeria Phage LP-125  [YP_008240092.2](https://www.ncbi.nlm.nih.gov/protein/YP_008240092.2?report=genbank&log$=prottop&blast_rank=1&RID=M2TZ4PJ3015) | 99.63% |
| ORF00P61_135 | 89896 | 91359 | 487 | Helicase DNaB-like | Listeria Virus A511  [YP_001468493.1](https://www.ncbi.nlm.nih.gov/protein/YP_001468493.1?report=genbank&log$=prottop&blast_rank=1&RID=M5BSH7GN015) | 99.79% |
| ORF00P61_136 | 91374 | 92426 | 350 | Recombination exonuclease | Listeria Virus P100  [YP_406421.1](https://www.ncbi.nlm.nih.gov/protein/YP_406421.1?report=genbank&log$=prottop&blast_rank=1&RID=M5C4CS7C014) | 99.71% |
| ORF00P61_137 | 92521 | 94404 | 627 | Recombination exonuclease | Listeria Phage LMTA-57  [AID17555.1](https://www.ncbi.nlm.nih.gov/protein/AID17555.1?report=genbank&log$=prottop&blast_rank=1&RID=M5CFD87Y015) | 99.04% |
| ORF00P61_138 | 94424 | 95014 | 196 | Hypothetical Protein | Listeria Virus A511 [YP_001468496.1](https://www.ncbi.nlm.nih.gov/protein/YP_001468496.1?report=genbank&log$=prottop&blast_rank=1&RID=M5CR4XZZ015) | 100.00% |
| ORF00P61_139 | 95014 | 96075 | 353 | DNA primase | Listeria Phage LMSP-25  [YP_009043125.1](https://www.ncbi.nlm.nih.gov/protein/YP_009043125.1?report=genbank&log$=prottop&blast_rank=1&RID=M5CX615Z015) | 99.43% |
| ORF00P61_140 | 96122 | 96769 | 215 | Putative deoxyuridine 5’-triphosphate nucleotidohydolase | Listeria Phage LP-048  [YP_009042925.1](https://www.ncbi.nlm.nih.gov/protein/YP_009042925.1?report=genbank&log$=prottop&blast_rank=2&RID=M7VYH9M9014) | 99.07% |
| ORF00P61_141 | 96766 | 96990 | 74 | Hypothetical Protein | Listeria Phage A511 | 98.65% |
| ORF00P61_142 | 96987 | 97310 | 107 | Hypothetical Protein | Listeria Phage LP-125 | 100.00% |
| ORF00P61_143 | 97303 | 97725 | 140 | Hypothetical Protein (PHA02277) | Listeria Virus  [YP_001468501.1](https://www.ncbi.nlm.nih.gov/protein/YP_001468501.1?report=genbank&log$=prottop&blast_rank=1&RID=M7YATKB6014) | 100.00% |
| ORF00P61_144 | 97728 | 98348 | 206 | Hypothetical Protein | Listeria Phage LMSP-25  [YP_009043130.1](https://www.ncbi.nlm.nih.gov/protein/YP_009043130.1?report=genbank&log$=prottop&blast_rank=1&RID=M7YMCZ0F014) | 99.51% |
| ORF00P61_145 | 98463 | 99812 | 449 | Ribonucleotide reductase of class Ia (aerobic) alpha subunit | Listeria Phage LMSP-25  [YP_009043131.1](https://www.ncbi.nlm.nih.gov/protein/YP_009043131.1?report=genbank&log$=prottop&blast_rank=1&RID=M7YTGSHU015) | 99.55% |
| ORF00P61_146 | 100023 | 101054 | 343 | Ribonucleotide reductase of class Ib (aerobic) alpha subunit | Listeria Phage LMTA 148  [YP_009055719.1](https://www.ncbi.nlm.nih.gov/protein/YP_009055719.1?report=genbank&log$=prottop&blast_rank=2&RID=M7Z5F1E3015) | 99.42% |
| ORF00P61_147 | 101260 | 102291 | 343 | Ribonucleotide-diphosphate reductase subunit beta | Listeria Phage LP-048  [YP_009042932.1](https://www.ncbi.nlm.nih.gov/protein/YP_009042932.1?report=genbank&log$=prottop&blast_rank=2&RID=M7ZG81XK015) | 99.42% |
| ORF00P61_148 | 102288 | 102740 | 150 | Flavodoxin | Listeria Virus A511 [YP_001468506.1](https://www.ncbi.nlm.nih.gov/protein/YP_001468506.1?report=genbank&log$=prottop&blast_rank=1&RID=M7ZYX93N015) | 100.00% |
| ORF00P61_149 | 102743 | 103039 | 98 | Hypothetical Protein | Listeria Phage LP-064 [YP_009592674.1](https://www.ncbi.nlm.nih.gov/protein/YP_009592674.1?report=genbank&log$=prottop&blast_rank=1&RID=M8070Y65014) | 100.00% |
| ORF00P61_150 | 103063 | 103374 | 103 | Thioredoxin | Listeria Virus A511 [YP_001468508.1](https://www.ncbi.nlm.nih.gov/protein/YP_001468508.1?report=genbank&log$=prottop&blast_rank=1&RID=M84MADCT01R) | 98.06% |
| ORF00P61_151 | 103460 | 103759 | 99 | Hypothetical Protein | Listeria Phage LP-125  [YP_008240109.1](https://www.ncbi.nlm.nih.gov/protein/YP_008240109.1?report=genbank&log$=prottop&blast_rank=1&RID=N7VM75PT015) | 98.99% |
| ORF00P61_152 | 103762 | 103899 | 45 | Hypothetical Protein | Listeria Phage List-36 [YP_009043420.1](https://www.ncbi.nlm.nih.gov/protein/YP_009043420.1?report=genbank&log$=prottop&blast_rank=1&RID=M85VRC2P014) | 97.78% |
| ORF00P61_153 | 103902 | 105089 | 395 | Hypothetical Protein | Listeria Virus P100 [YP_406438.1](https://www.ncbi.nlm.nih.gov/protein/YP_406438.1?report=genbank&log$=prottop&blast_rank=1&RID=M862M5W0015) | 98.48% |
| ORF00P61_154 | 105086 | 106000 | 304 | Ribose-Phosphate pyrophosphokinase | Listeria phage LP-083-2  [YP_009044602.1](https://www.ncbi.nlm.nih.gov/protein/YP_009044602.1?report=genbank&log$=prottop&blast_rank=1&RID=M86EAVS9014) | 98.68% |
| ORF00P61_155 | 106011 | 107795 | 594 | Putative nicotinamide phosphoribosyltransferase | Listeria Virus A511  [YP_001468513.1](https://www.ncbi.nlm.nih.gov/protein/YP_001468513.1?report=genbank&log$=prottop&blast_rank=1&RID=M882F54U01R) | 99.66% |
| ORF00P61_156 | 107891 | 108355 | 154 | Hypothetical Protein | Listeria Phage LMTA-94  [AID17141.1](https://www.ncbi.nlm.nih.gov/protein/AID17141.1?report=genbank&log$=prottop&blast_rank=1&RID=M8DBKKZA014) | 96.55% |
| ORF00P61_157 | 108369 | 110351 | 660 | PcfJ domain-containing protein | Listeria phage WIL-1 [YP_009100980.1](https://www.ncbi.nlm.nih.gov/protein/YP_009100980.1?report=genbank&log$=prottop&blast_rank=1&RID=M8DHD46H014) | 97.42% |
| ORF00P61_158 | 110445 | 111233 | 262 | Hypothetical Protein | Listeria Virus A511 [YP_001468515.1](https://www.ncbi.nlm.nih.gov/protein/YP_001468515.1?report=genbank&log$=prottop&blast_rank=1&RID=M8DWB394014) | 99.62% |
| ORF00P61_159 | 111226 | 111540 | 104 | Putative DNA-binding protein | Listeria Virus A511 [YP_001468516.1](https://www.ncbi.nlm.nih.gov/protein/YP_001468516.1?report=genbank&log$=prottop&blast_rank=1&RID=M8E29PS3015) | 100.00% |
| ORF00P61_160 | 111622 | 112458 | 278 | DNA polymerase | Listeria Phage vB LmoM AG20  [YP_007676796.1](https://www.ncbi.nlm.nih.gov/protein/YP_007676796.1?report=genbank&log$=prottop&blast_rank=1&RID=M8E9BKY1014) | 99.64% |
| ORF00P61_161 | 112733 | 114901 | 722 | DNA Polymerase I | Listeria Phage LMSP-25 [YP_009043145.1](https://www.ncbi.nlm.nih.gov/protein/YP_009043145.1?report=genbank&log$=prottop&blast_rank=1&RID=M8EGN7PR015) | 99.31% |
| ORF00P61_162 | 114996 | 115472 | 158 | Hypothetical Protein | Listeria Virus A511 [YP_001468519.1](https://www.ncbi.nlm.nih.gov/protein/YP_001468519.1?report=genbank&log$=prottop&blast_rank=1&RID=M8ESSDUY015) | 99.37% |
| ORF00P61_163 | 115508 | 116782 | 424 | Hypothetical Protein | Listeria Phage LMTA-94  [AID17135.1](https://www.ncbi.nlm.nih.gov/protein/AID17135.1?report=genbank&log$=prottop&blast_rank=1&RID=M8EX714A015) | 98.82% |
| ORF00P61_164 | 116852 | 118096 | 414 | Putative recombinase A | Listeria Virus A511 [YP_001468521.1](https://www.ncbi.nlm.nih.gov/protein/YP_001468521.1?report=genbank&log$=prottop&blast_rank=1&RID=M8F57FJK015) | 100.00% |
| ORF00P61_165 | 118158 | 118535 | 125 | Hypothetical Protein | Listeria Virus [YP_001468522.1](https://www.ncbi.nlm.nih.gov/protein/YP_001468522.1?report=genbank&log$=prottop&blast_rank=1&RID=M8FBY78B015) | 100.00% |
| ORF00P61_166 | 118535 | 119173 | 212 | Putative Sigma Factor | Listeria Phage vB LmoM AG20  [YP_007676802.1](https://www.ncbi.nlm.nih.gov/protein/YP_007676802.1?report=genbank&log$=prottop&blast_rank=1&RID=M8FH8KXR014) | 99.53% |
| ORF00P61_167 | 119232 | 119597 | 121 | Putative Holin | Listeria Virus A511  [YP_001468524.1](https://www.ncbi.nlm.nih.gov/protein/YP_001468524.1?report=genbank&log$=prottop&blast_rank=1&RID=M8FUF43F014) | 100.00% |
| ORF00P61_168 | 119615 | 120322 | 235 | Ig-like domain containing Protein | Listeria Phage LP-125 [YP_008240125.1](https://www.ncbi.nlm.nih.gov/protein/YP_008240125.1?report=genbank&log$=prottop&blast_rank=1&RID=M8FZVFWH015) | 99.57% |
| ORF00P61_169 | 120431 | 120817 | 128 | Hypothetical Protein | Listeria Phage LMSP-25  [YP_009043153.1](https://www.ncbi.nlm.nih.gov/protein/YP_009043153.1?report=genbank&log$=prottop&blast_rank=1&RID=M8M7RMBB015) | 99.22% |
| ORF00P61_170 | 120814 | 121743 | 309 | Hypothetical Protein | Listeria Phage List-36 [YP_009043402.1](https://www.ncbi.nlm.nih.gov/protein/YP_009043402.1?report=genbank&log$=prottop&blast_rank=1&RID=M8MD8V3K014) | 100.00% |
| ORF00P61_171 | 121802 | 123073 | 423 | Metallophosphoesterase domain containing protein | Listeria Phage LP-125  [YP_008240128.1](https://www.ncbi.nlm.nih.gov/protein/YP_008240128.1?report=genbank&log$=prottop&blast_rank=2&RID=M8MMHPJ9014) | 99.29% |
| ORF00P61_172 | 123093 | 123476 | 127 | Hypothetical Protein | Listeria Phage LP-125 [YP_008240129.1](https://www.ncbi.nlm.nih.gov/protein/YP_008240129.1?report=genbank&log$=prottop&blast_rank=1&RID=M8MX3W66015) | 100.00% |
| ORF00P61_173 | 123484 | 124029 | 181 | Hypothetical Protein | Listeria Phage List-36 [YP_009043399.1](https://www.ncbi.nlm.nih.gov/protein/YP_009043399.1?report=genbank&log$=prottop&blast_rank=1&RID=M8N537Z5014) | 100.00% |
| ORF00P61_174 | 124075 | 124281 | 68 | Hypothetical Protein | Listeria Phage vB LmoM AG20  [YP_007676810.1](https://www.ncbi.nlm.nih.gov/protein/YP_007676810.1?report=genbank&log$=prottop&blast_rank=1&RID=M8NAXU37015) | 100.00% |
| ORF00P61_175 | 124320 | 125039 | 239 | Hypothetical Protein | Listeria Phage LP-064 [YP_009592699.1](https://www.ncbi.nlm.nih.gov/protein/YP_009592699.1?report=genbank&log$=prottop&blast_rank=1&RID=M8NMWUJ8014) | 99.58% |
| ORF00P61_176 | 125050 | 125532 | 160 | Hypothetical Protein | Listeria Phage LMSP-25 [YP_009043159.1](https://www.ncbi.nlm.nih.gov/protein/YP_009043159.1?report=genbank&log$=prottop&blast_rank=1&RID=M8NX8BB4014) | 98.75% |
| ORF00P61_177 | 125592 | 126476 | 294 | Hypothetical Protein | Listeria Phage vB LmoM AG20 [YP_007676813.1](https://www.ncbi.nlm.nih.gov/protein/YP_007676813.1?report=genbank&log$=prottop&blast_rank=1&RID=M8P4TU7H014) | 99.32% |
| ORF00P61_178 | 126601 | 126774 | 57 | Hypothetical Protein | Listeria Phage LP-064 | 98.25% |
| ORF00P61_179 | 126780 | 127226 | 148 | Hypothetical Protein | Listeria Phage LP-064 [YP_009592703.1](https://www.ncbi.nlm.nih.gov/protein/YP_009592703.1?report=genbank&log$=prottop&blast_rank=1&RID=M8PPAPUD014) | 97.97% |
| ORF00P61_180 | 127219 | 128031 | 270 | Hypothetical Protein | Listeria Phage LMTA-34 [AII27267.1](https://www.ncbi.nlm.nih.gov/protein/AII27267.1?report=genbank&log$=prottop&blast_rank=1&RID=M8PUVUUK014) | 96.67% |
| ORF00P61_181 | 128036 | 129052 | 338 | AAA_5 Domain containing protein | Listeria Virus A511 [YP_001468538.1](https://www.ncbi.nlm.nih.gov/protein/YP_001468538.1?report=genbank&log$=prottop&blast_rank=1&RID=M8RCN39U015) | 97.93% |
| ORF00P61_182 | 129039 | 129884 | 281 | Hypothetical Protein | Listeria Phage LMTA-34 [AII27265.1](https://www.ncbi.nlm.nih.gov/protein/AII27265.1?report=genbank&log$=prottop&blast_rank=1&RID=M8R4JJ7K014) | 99.29% |
| ORF00P61_183 | 129946 | 130401 | 151 | Hypothetical Protein | Listeria Phage vB LmoM AG20 [YP_007676819.1](https://www.ncbi.nlm.nih.gov/protein/YP_007676819.1?report=genbank&log$=prottop&blast_rank=1&RID=M8R863NJ015) | 98.01% |
| ORF00P61_184 | 130407 | 130985 | 192 | Hypothetical Protein | Listeria Phage vB LmoM AG20 [YP_007676820.1](https://www.ncbi.nlm.nih.gov/protein/YP_007676820.1?report=genbank&log$=prottop&blast_rank=1&RID=M8RMBK4K014) | 97.40% |
| ORF00P61_185 | 131024 | 131596 | 190 | Hypothetical Protein | Listeria Phage vB LmoM AG20 [YP_007676821.1](https://www.ncbi.nlm.nih.gov/protein/YP_007676821.1?report=genbank&log$=prottop&blast_rank=1&RID=M8RN6CB2014) | 97.89% |
| ORF00P61_186 | 131593 | 132171 | 192 | Hypothetical Protein | Listeria Phage List-36 | 98.44% |
| ORF00P61_187 | 132164 | 132496 | 110 | Hypothetical Protein | Listeria Phage Lp-048 [YP_009042971.1](https://www.ncbi.nlm.nih.gov/protein/YP_009042971.1?report=genbank&log$=prottop&blast_rank=1&RID=M8SVKXB801R) | 98.18% |
| ORF00P61_188 | 132782 | 133510 | 242 | Hypothetical Protein | Listeria Phage vB LmoM AG20 [YP_007676824.1](https://www.ncbi.nlm.nih.gov/protein/YP_007676824.1?report=genbank&log$=prottop&blast_rank=1&RID=M8SXN7NY01R) | 99.59% |
| ORF00P61_189 | 133525 | 122992 | 155 | Hypothetical Protein | Listeria Phage LMSP-25 [YP_009042986.1](https://www.ncbi.nlm.nih.gov/protein/YP_009042986.1?report=genbank&log$=prottop&blast_rank=1&RID=M8T762B201R) | 100.00% |
| ORF00P61_190 | 134107 | 135183 | 358 | Putative transposase domain containing protein | Listeria Virus A511 [YP_001468547.1](https://www.ncbi.nlm.nih.gov/protein/YP_001468547.1?report=genbank&log$=prottop&blast_rank=1&RID=M8T7W3PY01R) | 98.60% |
| ORF00P61_191 | 135231 | 135800 | 189 | Hypothetical Protein | Listeria Virus A511 [YP_001468548.1](https://www.ncbi.nlm.nih.gov/protein/YP_001468548.1?report=genbank&log$=prottop&blast_rank=1&RID=M8THAZCM01R) | 100.00% |
| ORF00P61_192 | 135803 | 136336 | 177 | Hypothetical Protein | Listeria Phage vB AG20 [YP_007676828.1](https://www.ncbi.nlm.nih.gov/protein/YP_007676828.1?report=genbank&log$=prottop&blast_rank=1&RID=M8TPAZBZ01R) | 99.44% |
